# Supplementary material
Source: Research Square preprint supplement (doi:10.21203/rs.3.rs-9113826/v1)
Supplement: Supplementary file 1 [file bec5b2bfcd14f84bacda53a8.docx]

### Table 1. Baseline demographic, clinical and laboratory characteristics

| Variable | Value |
| --- | --- |
| Female sex | 56 (67.1%) |
| Mean age at onset (years) | 4.4 |
| Onset <5 years | 57 (69%) |
| Mean diagnostic delay (months) | 9 (2–48) |
| Monoarticular onset | 29 (35%) |
| Knee involvement | 83% |
| ANA positive | 59 (71%) |
| Uveitis | 20 (24%) |

### Table 2. Therapeutic strategies and disease outcomes

| Variable | Persistent (n=64) | Extended (n=18) | Total |
| --- | --- | --- | --- |
| Methotrexate use | 34 (53%) | 18 (100%) | 52 (63%) |
| Biologic therapy | 3 | 5 | 8 |
| Extension within 2 years | - | 100% | - |
| Relapses | 8 | 3 | 11 (14%) |
| Ocular complications | 11 | 2 | 13 |


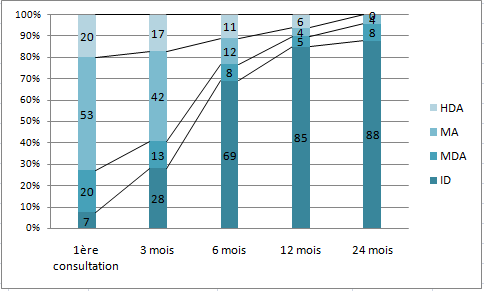


**Figure 1.** Evolution of disease activity according to JADAS-10 categories during the first 24 months of follow-up. The proportion of patients achieving inactive disease (ID) increased progressively, while moderate (MDA) and high disease activity (HDA) declined markedly. Most disease activity transitions occurred within the first year.
